# Supplementary material for: Heterogeneous side effects of cortical inactivation in behaving animals
Source: eLife journal article supplement (doi:10.7554/elife.66400), 2021-09-10
Supplement: supp [file elife-66400-supp-v1.zip]

## Sheet: Firing rates scaled
		LASER					CONTROL
		Contrast Level					Contrast Level
	UNIT #	0	1	2	3	4	0	1	2	3	4
	1	0.497487	0.4375	0.488281	0.445312	0.597656	0.445221	0.604022	0.644531	0.854167	0.580729
	2	0.40816	0.352381	0.471429	0.52381	0.609524	0.427604	0.522222	0.474074	0.588889	0.740741
	3	0.435582	0.501567	0.388715	0.727273	0.561129	0.435353	0.566005	0.658656	0.792755	0.71961
	4	0.264978	0.339869	0.316993	0.555556	0.571895	0.286305	0.355846	0.37618	0.584604	0.887073
	5	0.44558	0.472527	0.383394	0.772894	0.534799	0.463007	0.706553	0.526116	0.880342	0.897436
	6	0.29037	0.36	0.244444	0.604444	0.617778	0.317917	0.439012	0.532346	0.708642	0.808889
	7	0.433832	0.561562	0.501502	0.6997	0.693694	0.405476	0.558225	0.735736	0.698365	0.653987
	8	0.465509	0.542857	0.492063	0.626455	0.746032	0.453762	0.62716	0.674074	0.595885	0.720988
	9	0.487981	0.41453	0.683761	0.726496	0.517094	0.457599	0.548433	0.584995	0.664767	0.624881
	10	0.516602	0.703571	0.507143	0.771429	0.625	0.518164	0.663889	0.719444	0.772222	0.85
	11	0.393176	0.479592	0.374636	0.62828	0.542274	0.351164	0.513605	0.765306	0.72449	0.695011
	12	0.35625	0.489796	0.477551	0.469388	0.457143	0.363542	0.447619	0.701587	0.686772	0.809524
	13	0.334338	0.540305	0.433551	0.793028	0.83878	0.332948	0.528928	0.717018	0.796659	0.732268
	14	0.00173611	0.037037	0.047619	0.253968	0.285714	0.00665509	0.0205761	0.0411523	0.213992	0.547325
	15	0.312811	0.416149	0.600932	0.585404	0.771739	0.32436	0.544686	0.556763	0.791063	0.81401
	16	0.325708	0.383463	0.320155	0.46124	0.727132	0.30294	0.47304	0.355211	0.504134	0.851077
	17	0.410103	0.409149	0.499356	0.463273	0.89927	0.364726	0.520977	0.469287	0.606672	0.763101
	18	0.433541	0.565891	0.764858	0.516796	0.832041	0.370586	0.664575	0.613141	0.547681	0.80251
	19	0.3859	0.401325	0.677615	0.478632	0.867185	0.362829	0.4891	0.520119	0.622907	0.844905
	20	0.307312	0.413121	0.556023	0.653109	0.784011	0.322857	0.516181	0.497429	0.515194	0.719495
	21	0.320281	0.585586	0.489489	0.472973	0.684685	0.309167	0.535965	0.510153	0.669098	0.7574
	22	0.194092	0.370796	0.447112	0.435746	0.797843	0.173316	0.384907	0.415758	0.384907	0.672852
	23	0.18412	0.421735	0.410819	0.610039	0.727388	0.174817	0.404938	0.453704	0.487037	0.732099
	24	0.196576	0.433333	0.47037	0.566667	0.877037	0.184452	0.388254	0.436508	0.58194	0.741446
	25	0.120794	0.37963	0.420078	0.488791	0.892788	0.131307	0.364546	0.420983	0.474775	0.833241
	26	0.127255	0.396214	0.423336	0.440676	0.842162	0.119899	0.428417	0.380547	0.50686	0.851605
	27	0.14311	0.391232	0.492971	0.502422	0.886586	0.142636	0.431578	0.445159	0.511053	0.791227
	28	0.175734	0.358939	0.480433	0.432698	0.830133	0.168648	0.3856	0.397303	0.473093	0.768869
	29	0.27901	0.314574	0.438672	0.319384	0.786436	0.252555	0.383838	0.363636	0.369408	0.809524
	30	0.322857	0.412371	0.467354	0.360443	0.835052	0.263937	0.449026	0.505155	0.331042	0.857961
	31	0.219591	0.312629	0.362319	0.511387	0.807453	0.250604	0.376812	0.418219	0.3706	0.743271
	32	0.274985	0.26455	0.410935	0.388007	0.634921	0.282481	0.356261	0.432099	0.328042	0.92769
	33	0.408394	0.499089	0.519126	0.437766	0.905282	0.366234	0.581056	0.606557	0.472981	0.837887
	34	0.507315	0.493333	0.546667	0.522222	0.697778	0.469537	0.677778	0.637778	0.437778	0.757778
	35	0.287724	0.447917	0.46875	0.564236	0.668403	0.279333	0.380208	0.440972	0.409722	0.720486
	36	0.222452	0.3618	0.311295	0.488522	0.686869	0.206918	0.303949	0.484848	0.485767	0.647383
	37	0.373638	0.334786	0.498911	0.449528	0.742193	0.422431	0.444444	0.442266	0.564996	0.635439
	38	0.51662	0.57037	0.626667	0.884444	0.746667	0.515833	0.576296	0.726667	0.695556	0.826667
	39	0.420904	0.438795	0.676083	0.757062	0.80791	0.432674	0.387947	0.683616	0.679849	0.843691
	40	0.291629	0.32969	0.449909	0.555556	0.510018	0.272693	0.3898	0.582878	0.544627	0.715847
	41	0.00390625	0.0972222	0.104167	0.138889	0.5625	0.000434028	0.0972222	0.0972222	0.215278	0.319444
	42	0.151973	0.351691	0.523671	0.589372	0.765217	0.157287	0.362319	0.509179	0.518841	0.736232
	43	0.131139	0.404992	0.521739	0.429952	0.444444	0.149306	0.246377	0.468599	0.52657	0.625604
	44	0.256704	0.434824	0.464646	0.630592	0.63925	0.274681	0.377104	0.471861	0.59596	0.724387
	45	0.0815359	0.503268	0.533333	0.624837	0.739869	0.0608115	0.312418	0.60915	0.700654	0.830065
	46	0.143643	0.43254	0.630952	0.535714	0.509259	0.149223	0.402778	0.60119	0.656746	0.609127
	47	0.254648	0.571556	0.678222	0.756444	0.752	0.252574	0.521778	0.552	0.609778	0.771556
	48	0.212055	0.445534	0.643791	0.692084	0.59695	0.229439	0.496732	0.565359	0.619826	0.683007
	49	0.30001	0.41821	0.523148	0.571759	0.616512	0.271412	0.44213	0.428241	0.483796	0.739198
	50	0.358539	0.438272	0.45679	0.516461	0.716735	0.336291	0.5	0.576132	0.45679	0.661866
	51	0.428541	0.734568	0.465021	0.771605	0.723594	0.335905	0.621399	0.628258	0.644033	0.751715
	52	0.28464	0.496032	0.388889	0.301587	0.439153	0.262235	0.47619	0.47619	0.478175	0.450397
	53	0.24144	0.361985	0.507338	0.425577	0.8826	0.228905	0.482879	0.538784	0.647799	0.834382
	54	0.232916	0.374022	0.497653	0.72457	0.732394	0.211202	0.363067	0.486698	0.699531	0.888889
	55	0.20075	0.452107	0.321839	0.570881	0.616858	0.199393	0.298851	0.559387	0.517241	0.869732
	56	0.022963	0.168889	0.275556	0.32	0.52	0.0215741	0.146667	0.266667	0.244444	0.715556
	57	0.134259	0.327044	0.557652	0.45283	0.746331	0.130197	0.318658	0.404612	0.530398	0.72956
	58	0.057581	0.219136	0.262346	0.259259	0.689815	0.0915316	0.228395	0.302469	0.305556	0.689815
	59	0.216221	0.359396	0.491084	0.657064	0.792867	0.215249	0.44856	0.499314	0.503429	0.813443
	60	0.112639	0.402222	0.691111	0.657778	0.822222	0.123472	0.482222	0.633333	0.753333	0.804444
	61	0.228616	0.477072	0.719577	0.82716	0.858025	0.252829	0.574074	0.791887	0.901235	0.907407
	62	0.138964	0.401434	0.379928	0.451613	0.387097	0.116861	0.396655	0.480287	0.523297	0.512545
	63	0.304636	0.455099	0.57382	0.51446	0.772704	0.30898	0.480974	0.627093	0.715373	0.521055
	64	0.410044	0.53858	0.524691	0.487654	0.724794	0.410815	0.598765	0.699074	0.631173	0.718107
	65	0.185509	0.28	0.42	0.413333	0.322222	0.220139	0.44	0.535556	0.44	0.476296
	66	0.378914	0.327273	0.381818	0.50101	0.653199	0.358039	0.525253	0.59798	0.49899	0.616162
	67	0.320268	0.401758	0.542373	0.553672	0.47646	0.289509	0.654739	0.619586	0.621469	0.583804
	68	0.500091	0.646199	0.643275	0.761696	0.951754	0.53192	0.55848	0.643275	0.646199	0.783626
	69	0.476007	0.546737	0.684303	0.507937	0.657848	0.502829	0.647266	0.705467	0.731922	0.693122
	70	0.444916	0.647249	0.747573	0.828479	0.702265	0.480751	0.524272	0.839806	0.778317	0.648867
	71	0.560105	0.588761	0.600255	0.652618	0.581098	0.608371	0.685824	0.91954	0.694764	0.716475
	72	0.484308	0.534884	0.617571	0.68863	0.569767	0.526863	0.599483	0.786822	0.75969	0.719638
	73	0.491832	0.601533	0.679438	0.744572	0.625372	0.484861	0.637292	0.701149	0.587484	0.688804
	74	0.303356	0.4125	0.511111	0.400463	0.641667	0.326534	0.4375	0.586111	0.643056	0.727778
	75	0.423993	0.540453	0.67206	0.807983	0.846818	0.462918	0.536138	0.803668	0.71521	0.796117
	76	0.305734	0.429487	0.527778	0.777778	0.700855	0.345531	0.413462	0.688034	0.717949	0.819444
	77	0.397169	0.430199	0.608262	0.861823	0.773504	0.407051	0.504274	0.821937	0.811966	0.843305
	78	0.295923	0.470544	0.553318	0.821029	0.730798	0.278197	0.467562	0.660701	0.794929	0.672632
	79	0.217233	0.414815	0.397531	0.587654	0.572016	0.180916	0.323457	0.412346	0.553086	0.463374
	80	0.377315	0.510138	0.599351	0.846715	0.713706	0.372009	0.522303	0.662612	0.751825	0.844282
	81	0.307719	0.444444	0.632058	0.821494	0.721311	0.303905	0.454463	0.64663	0.686703	0.862477
	82	0.530024	0.478548	0.548955	0.343601	0.888889	0.484301	0.486249	0.619362	0.580125	0.686469
	83	0.40704	0.301142	0.380062	0.478712	0.925234	0.442562	0.457944	0.38837	0.464174	0.788162
	84	0.367519	0.464327	0.280702	0.361404	0.712281	0.361233	0.443275	0.491618	0.578947	0.82807
	85	0.124769	0.194444	0.311111	0.2	0.6	0.158102	0.177778	0.166667	0.255556	0.55
	86	0.384738	0.537676	0.510856	0.615581	0.720307	0.350335	0.353768	0.42401	0.58493	0.853129
	87	0.195806	0.313725	0.205882	0.196078	0.748366	0.18219	0.29085	0.343137	0.382353	0.640523
	88	0.427184	0.5	0.380259	0.579827	0.81068	0.384304	0.571197	0.543689	0.598706	0.73301
	89	0.433168	0.391639	0.509351	0.625229	0.718372	0.414398	0.519252	0.639164	0.6652	0.812981
	90	0.471652	0.403419	0.280342	0.495726	0.538462	0.430199	0.45641	0.468376	0.508262	0.716239
	91	0.207292	0.213889	0.191667	0.2	0.425	0.220312	0.252778	0.352778	0.202778	0.586111
	92	0.42252	0.34127	0.35873	0.325397	0.661905	0.391799	0.533333	0.650794	0.556614	0.877778
	93	0.490074	0.634652	0.329567	0.414313	0.757062	0.502197	0.59322	0.854991	0.774011	0.649718
	94	0.374767	0.44789	0.28596	0.439276	0.691645	0.364808	0.421763	0.469423	0.433247	0.386736
	95	0.640509	0.688889	0.606878	0.466138	0.84127	0.703042	0.792063	0.858201	0.734392	0.825397
	96	0.322929	0.45697	0.311515	0.344916	0.534545	0.347407	0.578182	0.521616	0.491448	0.625051
	97	0.40812	0.505983	0.594872	0.615385	0.695726	0.339316	0.776068	0.723077	0.639316	0.68547
	98	0.258569	0.457115	0.45809	0.554581	0.752437	0.260884	0.503899	0.561404	0.5	0.753411
	99	0.32661	0.562422	0.622971	0.725343	0.848939	0.341682	0.652934	0.598002	0.602996	0.842072
	100	0.160418	0.458647	0.526316	0.525898	0.74812	0.16054	0.362155	0.517544	0.566834	0.789474
	101	0.0741645	0.356771	0.381076	0.434896	0.555556	0.0634585	0.366319	0.37066	0.408854	0.663194
	102	0.224776	0.582839	0.666667	0.682879	0.777382	0.219034	0.561487	0.541716	0.634638	0.682088
	103	0.401576	0.543893	0.570686	0.775887	0.845863	0.396011	0.478802	0.477541	0.70922	0.582033
	104	0.500723	0.621528	0.463542	0.564236	0.652778	0.446651	0.524306	0.569444	0.574653	0.765625
	105	0.397533	0.523207	0.361463	0.680731	0.866385	0.417194	0.612283	0.586498	0.797468	0.755274
	106	0.580705	0.722222	0.597386	0.748366	0.678867	0.55866	0.636601	0.724837	0.805882	0.66841
	107	0.48903	0.683575	0.47504	0.514493	0.536232	0.523148	0.719807	0.641707	0.637681	0.555556
	108	0.4	0.496296	0.525926	0.675926	0.509259	0.409336	0.601852	0.422222	0.711111	0.551852
	109	0.398148	0.418803	0.478632	0.57265	0.547009	0.371795	0.589744	0.593162	0.644444	0.740741
	110	0.424112	0.394895	0.456456	0.632132	0.498999	0.405749	0.747748	0.60961	0.588589	0.704705
	111	0.0999899	0.172705	0.23913	0.527778	0.5	0.0803895	0.258454	0.300725	0.479469	0.505233
	112	0.352016	0.455261	0.397247	0.633235	0.580465	0.365495	0.575221	0.608653	0.59292	0.608653
	113	0.229127	0.309592	0.335233	0.54416	0.512821	0.210886	0.491928	0.443495	0.492877	0.494777
	114	0.145262	0.226551	0.266955	0.520924	0.493506	0.116853	0.33189	0.365079	0.378066	0.464646
	115	0.192791	0.259524	0.335714	0.454762	0.539153	0.181614	0.430952	0.319841	0.484921	0.545767
	116	0.218515	0.234568	0.371823	0.51634	0.431373	0.22549	0.448802	0.333333	0.512709	0.619463
	117	0.365859	0.472045	0.501769	0.58811	0.588346	0.315744	0.465676	0.431706	0.54494	0.499646
	118	0.47082	0.506083	0.458232	0.549067	0.631792	0.430725	0.65369	0.508516	0.552311	0.675047
	119	0.467515	0.509877	0.755556	0.377778	0.444444	0.495139	0.72963	0.666667	0.696296	0.585185
	120	0.514569	0.785223	0.795533	0.440435	0.701031	0.573275	0.742268	0.829897	0.76575	0.726804
	121	0.475178	0.651282	0.651282	0.517949	0.65641	0.469444	0.535043	0.808547	0.62735	0.598291
	122	0.473016	0.696825	0.774603	0.490476	0.519048	0.446164	0.563492	0.753968	0.652381	0.596825
	123	0.457265	0.716524	0.594017	0.541311	0.60114	0.473973	0.592593	0.840456	0.673789	0.568376
	124	0.222249	0.309343	0.241162	0.469697	0.70202	0.273569	0.366162	0.290404	0.545455	0.844697
	125	0.364945	0.520833	0.420139	0.313657	0.423611	0.397786	0.482639	0.628472	0.457176	0.746528
	126	0.23689	0.265836	0.17134	0.33541	0.759086	0.255106	0.314988	0.292835	0.371755	0.649013
	127	0.345477	0.290216	0.361249	0.3466	0.684909	0.353165	0.44859	0.420398	0.502488	0.795191
	128	0.194265	0.198748	0.350548	0.377934	0.906886	0.193499	0.260824	0.289515	0.410798	0.866197
	129	0.206989	0.41816	0.235364	0.37276	0.829152	0.196187	0.410992	0.333333	0.403823	0.732378
	130	0.361675	0.316239	0.435897	0.531339	0.725071	0.372181	0.485755	0.487179	0.656695	0.834758
	131	0.298032	0.236111	0.377525	0.450758	0.790404	0.299505	0.425505	0.478535	0.464646	0.676768
	132	0.494676	0.649259	0.65	0.717778	0.73	0.540949	0.68	0.687778	0.733333	0.836667
	133	0.5375	0.508889	0.586667	0.6	0.646667	0.558333	0.646667	0.571111	0.708889	0.804444
	134	0.266403	0.304598	0.252874	0.237548	0.484674	0.25878	0.436782	0.641762	0.643678	0.837165
	135	0.366136	0.183007	0.494118	0.509804	0.282353	0.381699	0.369281	0.496078	0.421569	0.509804
	136	0.447983	0.487302	0.149206	0.217989	0.506349	0.371858	0.574603	0.377778	0.457672	0.452381
	137	0.435173	0.383787	0.59675	0.229025	0.544218	0.56452	0.545918	0.888133	0.591837	0.507937
	138	0.578554	0.632975	0.442294	0.478853	0.736201	0.499403	0.708244	0.626523	0.484588	0.589964
	139	0.245509	0.202222	0.591111	0.566667	0.177778	0.399769	0.253333	0.497778	0.503704	0.544444
	140	0.354588	0.555556	0.707071	0.673401	0.20202	0.401936	0.383838	0.565657	0.558923	0.767677
	141	0.450817	0.712418	0.661002	0.504575	0.456209	0.521024	0.530719	0.633987	0.628322	0.571242
	142	0.365853	0.394265	0.439665	0.405018	0.575269	0.378286	0.401434	0.498208	0.478495	0.758065
	143	0.312265	0.376275	0.369834	0.371981	0.747719	0.297236	0.392915	0.362856	0.573269	0.686527
	144	0.232133	0.291262	0.261057	0.349515	0.516721	0.229953	0.323625	0.24164	0.458468	0.657318
	145	0.273401	0.390625	0.44647	0.378472	0.601562	0.321343	0.389757	0.365741	0.403646	0.819444
	146	0.0553775	0.025641	0.126068	0.042735	0.84188	0.0584936	0.0918803	0.0940171	0.115385	0.698718
	147	0.155395	0.130077	0.289855	0.203435	0.70263	0.201255	0.234389	0.209877	0.398282	0.77241
	148	0.463743	0.553059	0.590096	0.561798	0.635456	0.467879	0.45568	0.56263	0.694132	0.781523
	149	0.32129	0.327327	0.507508	0.325826	0.569069	0.327171	0.432432	0.358859	0.448949	0.684685
	150	0.448611	0.402614	0.393464	0.486275	0.79085	0.449401	0.51634	0.508497	0.585621	0.786928
	151	0.343425	0.225443	0.312399	0.265459	0.493322	0.29809	0.390016	0.280193	0.331401	0.702093
	152	0.20605	0.269699	0.205817	0.281879	0.582182	0.193907	0.248471	0.255034	0.286577	0.632364
	153	0.297461	0.302154	0.243039	0.28159	0.65377	0.274204	0.281968	0.360908	0.356529	0.612868
	154	0.321565	0.285394	0.346774	0.345923	0.640892	0.332806	0.377599	0.46371	0.439695	0.642025
	155	0.394702	0.370488	0.318871	0.373122	0.638655	0.38664	0.422998	0.459259	0.478307	0.663845
	156	0.275235	0.23854	0.225547	0.289473	0.670533	0.243908	0.304355	0.375793	0.340074	0.638725
	157	0.289998	0.236315	0.164384	0.328615	0.537798	0.259815	0.249417	0.343988	0.362709	0.732623
	158	0.273446	0.389884	0.311654	0.414146	0.538379	0.256642	0.309068	0.383477	0.363503	0.683875
	159	0.422685	0.502284	0.325905	0.470951	0.525842	0.383854	0.430488	0.586472	0.560593	0.662063
	160	0.429868	0.391658	0.282451	0.424611	0.606377	0.40918	0.474766	0.509346	0.492212	0.688474
	161	0.354751	0.275345	0.257429	0.315337	0.673665	0.336067	0.357528	0.440206	0.517217	0.6678
	162	0.570695	0.432029	0.383495	0.455472	0.417094	0.586639	0.565086	0.453385	0.549753	0.602469
	163	0.645185	0.5525	0.624	0.635556	0.694286	0.594645	0.58	0.588235	0.714667	0.76
	164	0.369724	0.27619	0.445079	0.341799	0.534694	0.383607	0.442857	0.517087	0.417143	0.604233
	165	0.0914735	0.107456	0.0982456	0.136452	0.573099	0.100773	0.225146	0.115583	0.234698	0.597358
	166	0.42392	0.389583	0.346667	0.457407	0.607143	0.449636	0.389583	0.552941	0.613333	0.616667
	167	0.388239	0.285088	0.373099	0.381092	0.493734	0.384215	0.369518	0.368765	0.437427	0.528265
	168	0.214226	0.224242	0.161616	0.272727	0.6	0.189057	0.19798	0.264646	0.387879	0.558249
	169	0.18051	0.131646	0.224422	0.283828	0.624129	0.218693	0.200587	0.323432	0.336634	0.498717
	170	0.346658	0.466853	0.436041	0.45098	0.608466	0.36471	0.443511	0.453782	0.532213	0.519763
	171	0.336283	0.352263	0.321811	0.464198	0.575309	0.309122	0.37284	0.412346	0.447737	0.691358
	172	0.213574	0.243187	0.230608	0.336129	0.517121	0.211522	0.171908	0.268344	0.392034	0.641975
	173	0.297598	0.40191	0.350694	0.30816	0.582176	0.257668	0.337674	0.347222	0.556424	0.585648
	174	0.304877	0.428148	0.191111	0.517037	0.38963	0.26392	0.277037	0.362963	0.533333	0.588148
	175	0.23827	0.353234	0.274461	0.393864	0.550028	0.261609	0.218076	0.422886	0.577114	0.718629
	176	0.24403	0.317089	0.327485	0.415854	0.625081	0.249499	0.252112	0.361923	0.439896	0.721897
	177	0.33224	0.374486	0.243827	0.317901	0.762346	0.329347	0.343621	0.37963	0.493827	0.861111
	178	0.398491	0.325446	0.382716	0.537037	0.555556	0.382245	0.311385	0.526749	0.600823	0.743827
	179	0.21977	0.297515	0.30117	0.472953	0.560673	0.2048	0.188596	0.309942	0.476608	0.675439
	180	0.305009	0.403549	0.371142	0.459877	0.586934	0.305684	0.310185	0.440586	0.601852	0.751029
	181	0.374604	0.491491	0.486486	0.472472	0.659326	0.378545	0.361361	0.560561	0.668669	0.759092
	182	0.222706	0.358974	0.351648	0.363858	0.359381	0.215812	0.214896	0.302808	0.512821	0.473748
	183	0.639969	0.699259	0.755556	0.653333	0.748148	0.632346	0.684444	0.607407	0.755556	0.736296
	184	0.428517	0.291874	0.492537	0.560531	0.724157	0.36695	0.567164	0.457711	0.631841	0.73466
	185	0.39443	0.606299	0.334208	0.384077	0.766113	0.435641	0.699038	0.379703	0.553806	0.887431
	186	0.245471	0.226651	0.25	0.352657	0.67029	0.238929	0.270531	0.251208	0.350242	0.628422
	187	0.171771	0.266857	0.273504	0.205128	0.424501	0.130104	0.132004	0.287749	0.316239	0.51567
	188	0.298611	0.302778	0.319444	0.408333	0.703704	0.279456	0.425	0.522222	0.508333	0.572222
	189	0.433102	0.274074	0.392593	0.481481	0.645679	0.46358	0.503704	0.614815	0.485185	0.682716
	190	0.374724	0.252626	0.298507	0.512438	0.552239	0.374793	0.346048	0.507463	0.694859	0.713101
	191	0.244879	0.277286	0.471976	0.645034	0.52409	0.210218	0.359882	0.495575	0.610619	0.418879
	192	0.316884	0.407614	0.45748	0.49969	0.733292	0.331859	0.386923	0.342024	0.513966	0.672874
	193	0.293516	0.294988	0.40942	0.618659	0.704408	0.318123	0.379831	0.371377	0.5	0.645833
	194	0.462179	0.345299	0.480342	0.422222	0.413105	0.358547	0.45641	0.500855	0.692308	0.662678
	195	0.290368	0.346267	0.336861	0.560259	0.669998	0.297178	0.38154	0.445032	0.569665	0.557907
	196	0.573594	0.544856	0.49465	0.459259	0.567901	0.504235	0.557202	0.665021	0.627984	0.575309
	197	0.315934	0.324074	0.431481	0.394444	0.283333	0.295756	0.322222	0.342593	0.362963	0.331481
	198	0.449901	0.411111	0.314286	0.5	0.453439	0.438393	0.466667	0.563492	0.526984	0.4
	199	0.146348	0.150892	0.200732	0.161866	0.233196	0.450417	0.433471	0.507545	0.481481	0.48331
	200	0.205326	0.345228	0.14193	0.332793	0.120032	0.480941	0.445796	0.51176	0.555285	0.596918
	201	0.176157	0.0851852	0.0592593	0.244444	0.037037	0.376003	0.5	0.47037	0.47284	0.42963
	202	0.253415	0.502353	0.0761203	0.313076	0.169429	0.666603	0.742787	0.71639	0.702885	0.692449
	203	0.182917	0.0933333	0.516296	0.113333	0.16	0.509907	0.66	0.628148	0.642222	0.608889
	204	0.371652	0.307692	0.388034	0.360114	0.409687	0.571724	0.557265	0.663248	0.614245	0.733333
	205	0.293945	0.500294	0.480306	0.206349	0.315697	0.580357	0.686655	0.716637	0.687831	0.80776
	206	0.341049	0.304527	0.185185	0.259259	0.45679	0.435957	0.471193	0.549383	0.62963	0.833333
	207	0.35092	0.549232	0.262873	0.315718	0.147696	0.440775	0.524842	0.53794	0.619241	0.512195
	208	0.41981	0.407407	0.47749	0.391762	0.784004	0.413095	0.387931	0.467433	0.522989	0.794061
	209	0.481127	0.407407	0.316316	0.640307	0.871872	0.521021	0.702703	0.496496	0.544878	0.730731
	210	0.191799	0.234568	0.021164	0.306878	0.687831	0.204365	0.252205	0.282187	0.449735	0.481481
	211	0.227597	0.185185	0.271186	0.271186	0.832392	0.251452	0.31199	0.26177	0.378531	0.625235
	212	0.404913	0.528395	0.534568	0.553086	0.711111	0.45072	0.495062	0.490123	0.679012	0.848148
	213	0.346109	0.504923	0.440225	0.575246	0.270511	0.400111	0.417722	0.37834	0.485232	0.718237
	214	0.460556	0.44	0.777778	0.564444	0.675556	0.476667	0.386667	0.671111	0.573333	0.737778

## Sheet: RespType_ID_Layer
UNIT #	CRF RESPONSE TYPE	Session Number	chNum	Layer (1=SG, 2=G, 3=IG)
1	1	1	2	1
2	1	1	4	1
3	1	1	5	1
4	1	1	6	1
5	1	1	7	1
6	1	1	8	2
7	2	1	9	2
8	1	1	11	2
9	1	1	13	3
10	1	1	14	3
11	2	1	16	3
12	2	1	18	3
13	3	1	20	3
14	2	1	22	3
15	1	1	23	3
16	1	2	2	NaN
17	3	2	3	NaN
18	4	2	4	NaN
19	3	2	5	NaN
20	4	2	7	NaN
21	1	2	9	NaN
22	4	2	10	NaN
23	4	2	11	NaN
24	4	2	12	NaN
25	4	2	13	NaN
26	1	2	14	NaN
27	3	2	15	NaN
28	4	2	16	NaN
29	2	3	1	NaN
30	2	3	2	NaN
31	3	3	3	NaN
32	1	3	4	NaN
33	3	3	5	NaN
34	1	3	7	NaN
35	2	3	14	NaN
36	3	3	15	NaN
37	3	4	1	1
38	2	4	2	1
39	2	4	3	2
40	1	4	4	2
41	3	4	5	2
42	4	4	6	2
43	2	4	7	2
44	2	4	8	3
45	2	4	9	3
46	2	4	10	3
47	4	4	11	3
48	3	4	13	3
49	2	4	15	3
50	3	4	16	3
51	2	4	18	3
52	1	4	20	3
53	3	5	6	1
54	2	5	7	2
55	2	5	8	2
56	2	5	9	2
57	4	5	10	2
58	1	5	11	2
59	4	5	12	3
60	1	5	14	3
61	1	5	15	3
62	2	5	16	3
63	1	5	17	3
64	2	5	19	3
65	2	5	21	3
66	1	5	23	3
67	1	5	25	3
68	4	6	2	1
69	2	6	3	1
70	2	6	4	1
71	1	6	6	1
72	2	6	8	1
73	4	6	9	1
74	2	6	10	1
75	2	6	11	2
76	1	6	12	2
77	2	6	14	2
78	3	6	15	2
79	4	6	16	3
80	1	6	17	3
81	2	6	18	3
82	3	7	3	NaN
83	2	7	7	NaN
84	3	7	9	NaN
85	2	7	10	NaN
86	2	7	11	NaN
87	3	7	12	NaN
88	3	7	13	NaN
89	3	7	15	NaN
90	3	7	18	NaN
91	1	7	19	NaN
92	1	7	20	NaN
93	1	7	22	NaN
94	4	7	23	NaN
95	1	8	2	1
96	1	8	4	1
97	1	8	6	1
98	3	8	8	2
99	3	8	9	2
100	2	8	10	2
101	2	8	13	3
102	4	8	14	3
103	2	8	17	3
104	2	8	18	3
105	3	8	19	3
106	1	8	21	3
107	1	9	2	1
108	1	9	5	2
109	1	9	6	2
110	1	9	7	2
111	3	9	8	2
112	2	9	9	2
113	1	9	10	3
114	3	9	11	3
115	3	9	12	3
116	1	9	14	3
117	4	9	15	3
118	1	9	16	3
119	1	10	5	1
120	1	10	11	2
121	2	10	15	2
122	1	10	16	3
123	1	10	17	3
124	1	11	4	NaN
125	1	11	5	NaN
126	3	11	6	NaN
127	1	11	7	NaN
128	3	11	9	NaN
129	3	11	10	NaN
130	1	11	11	NaN
131	3	11	13	NaN
132	1	11	17	NaN
133	1	11	22	NaN
134	1	12	2	1
135	1	13	4	2
136	1	13	5	2
137	1	13	6	2
138	3	13	16	3
139	2	13	18	3
140	2	13	22	3
141	1	14	4	2
142	1	14	6	2
143	3	14	8	2
144	2	14	9	2
145	2	14	11	3
146	3	14	12	3
147	1	14	13	3
148	2	14	14	3
149	1	14	15	3
150	1	14	18	3
151	1	15	4	2
152	1	15	7	2
153	3	15	9	3
154	1	15	11	3
155	1	15	13	3
156	1	15	14	3
157	1	15	17	3
158	2	15	20	3
159	1	15	22	3
160	1	15	23	3
161	1	16	12	NaN
162	1	16	22	NaN
163	2	16	24	NaN
164	1	16	25	NaN
165	1	16	26	NaN
166	1	16	29	NaN
167	1	16	42	NaN
168	3	17	1	2
169	3	17	2	2
170	3	17	3	2
171	1	17	4	2
172	2	17	5	2
173	2	17	6	3
174	2	17	7	3
175	2	18	1	2
176	2	18	2	2
177	1	18	3	2
178	1	18	4	2
179	2	18	6	3
180	2	18	7	3
181	2	18	8	3
182	2	18	9	3
183	2	18	12	3
184	1	19	4	2
185	1	19	6	2
186	3	19	7	2
187	2	19	8	2
188	3	19	10	3
189	1	19	12	3
190	1	19	14	3
191	4	19	15	3
192	2	19	16	3
193	3	19	17	3
194	2	20	5	2
195	3	20	6	3
196	1	20	8	3
197	4	20	12	3
198	1	21	3	NaN
199	1	21	16	NaN
200	1	21	17	NaN
201	1	21	18	NaN
202	1	21	19	NaN
203	1	21	20	NaN
204	1	21	21	NaN
205	1	21	22	NaN
206	1	21	24	NaN
207	1	21	28	NaN
208	2	21	32	NaN
209	3	21	33	NaN
210	3	21	37	NaN
211	3	21	38	NaN
212	2	21	40	NaN
213	2	21	44	NaN
214	2	21	47	NaN

## Sheet: Linear Discriminant
						Real Data		label=CRF type						Random Chance (shuffled)			label=randomized(CRF type)
Classification Learner						MEAN	0.7434	0.882	0.83	0.908	0.96			MEAN	0.3322	0.504	0.514	0.456	0.5
Linear discriminant						SEM	0.0257441	0.0217715	0.0178885	0.0237487	0.0126491			SEM	0.0193969	0.0269444	0.0326497	0.0374967	0.0807465
25% hold out validation							1.34337e-06	4.40846e-06	2.84447e-05	7.40838e-06	0.000493764
								AUC ROC								AUC ROC
input= firingrate difference (L-C) all contrasts						model run	Accuracy	Type 1	Type2	Type 3	Type 4			model run	Accuracy	Type 1	Type2	Type 3	Type 4
						1	83	0.92	0.88	0.99	0.93			1	30.2	0.52	0.5	0.39	0.43
						2	71.7	0.93	0.86	0.93	0.93			2	34	0.45	0.59	0.5	0.29
						3	69.8	0.81	0.82	0.89	0.97			3	39.6	0.6	0.59	0.38	0.77
						4	69.8	0.89	0.78	0.86	0.98			4	28.3	0.46	0.44	0.43	0.57
						5	77.4	0.86	0.81	0.87	0.99			5	34	0.49	0.45	0.58	0.44
