# Supplementary material for: Heterogeneous side effects of cortical inactivation in behaving animals
Source: eLife journal article supplement (doi:10.7554/elife.66400), 2021-09-10
Supplement: supp [file Figure1_source_data.xlsx]

## Sheet: Sheet1
Gt-ACR2 BIOPSY RESULTS
H:\confocal
Pinhole was 100, all channels
				Cell counts
Image sample				NeuN (Blue)	YFP (Red)	CamKII (Green)
171030_slide3_40x_01				12	12	12
171030_slide3_40x_02				15	15	15
171030_slide3_40x_03				19	18	18
171030_slide3_40x_04				13	12	12
171030_slide3_40x_05				10	10	10
171030_slide3_40x_06				19	16	19
171030_slide3_40x_07				15	10	10
			Total	103	93	96
			MEAN	14.7143	13.2857	13.7143
			SEM	1.28571	1.16934	1.3924
RESULTS SUMMARY
96/103 neurons expressed camkii				0.873786
93/96 camkii neurons expressed acr-gfp				0.96875	Expression efficiency
93/93 gfp neurons were positive for neun				1	specificity
			POSITIVE	NEGATIVE
%GFP CELLS THAT WERE ALSO			100	0	CAMKII
			100	0	NEUN
