# Supplementary material for: Heterogeneous side effects of cortical inactivation in behaving animals
Source: eLife journal article supplement (doi:10.7554/elife.66400), 2021-09-10
Supplement: supp [file Figure3_source_data.xlsx]

## Sheet: DivNorm Model Params
UNIT #	Rmax	c50	n	offset	P	Q	measured c50
1	1.08737	0.0439254	1.91506	1.8745	-25.2887	19.4612	0.04
2	0.546429	1	1.73634	0.28114	0.235957	2.86655e-08	0.53
3	0.733169	0.0626292	1.978	-0.0808674	0.0309508	0.0400533	0.06
4	0.615217	0.999999	1.61165	0.301314	0.0245899	1.52035e-08	0.51
5	0.775678	0.999997	0.592032	0.080396	0.427399	0.00287932	0.16
6	0.745481	0.377415	0.730604	0.729647	-1.34412	1.64824	0.15
7	0.701209	0.049743	19.9824	0.232938	0.750227	1.66363	0.05
8	1.48582	0.999981	0.120699	3.7252	-48.0846	20.7008	0.01
9	0.729207	0.0559287	1.52734	-0.0900896	0.0123418	0.00416478	0.06
10	0.775934	0.997422	0.386227	0.0743929	0.588235	8.26913e-07	0.06
11	0.628394	0.0507389	18.9869	0.00543486	0.920592	1.24811	0.05
12	0.494796	0.0655901	4.68958	-0.0319721	2.76679e-06	2.48634e-07	0.07
13	0.823861	0.0528792	3.30653	0.0206515	0.00713891	0.0142731	0.05
14	0.253211	0.541779	7.16235	0.0737112	-0.00112373	8.60383e-09	0.54
15	0.59457	0.181421	0.675316	0.280665	0.0198634	0.0496844	0.09
16	0.742968	0.215524	13.4318	0.0745925	0.102333	0.255094	0.22
17	1.79854	0.999703	0.598752	6.54873	-50	13.4993	0.16
18	1.45937	0.999999	0.31763	3.63704	-25.6259	10.6868	0.03
19	0.998377	0.643702	0.717527	1.26533	-2.62984	2.29946	0.18
20	0.787208	1	0.489986	0.528459	-0.307912	0.0271302	0.11
21	0.688581	0.144607	0.632488	0.0532781	0.123691	1.71733e-06	0.07
22	1.07178	1	0.525983	2.35122	-9.0285	3.51701	0.12
23	0.731251	1	0.481455	0.574314	-0.523969	3.53742e-07	0.1
24	0.766644	0.139848	0.889869	0.285652	-0.0253422	0.109602	0.1
25	0.932016	1	0.595673	0.954375	-1.17194	0.338745	0.16
26	0.986513	0.999986	0.561671	0.996125	-1.45008	0.695666	0.14
27	1.08265	1	0.47742	1.5272	-3.02479	1.38311	0.1
28	1.09281	0.999971	0.590443	0.868215	-1.11991	0.814732	0.16
29	1.23398	1	1.39306	2.51881	-11.3297	5.34951	0.45
30	0.933016	0.996997	9.87282	1.17481	-2.40734	1.89396	0.89
31	0.841317	0.999998	0.957139	0.559715	-0.365734	1.22393e-07	0.32
32	0.673981	0.99967	3.26953	0.915858	-2.732	2.16562	0.71
33	1.81056	1	0.584032	6.40278	-50	14.0097	0.15
34	1.37845	1	0.376399	3.39383	-44.7971	20.0674	0.05
35	0.594487	1	0.836961	0.446736	-0.138516	2.44569e-07	0.27
36	0.655456	0.103709	1.23814	0.112714	0.034673	0.11781	0.09
37	0.787538	0.177214	5.17435	0.824368	-1.38078	2.65093	0.18
38	0.892915	0.110475	1.12825	-0.0464053	0.0520774	5.23172e-10	0.1
39	0.817121	0.0915876	14.2088	0.378026	0.394118	1.64994	0.09
40	0.562667	0.0965701	1.05518	0.0137634	0.0408381	5.31891e-08	0.08
41	0.606587	0.177928	1.10962	1.04621	-3.45018	1.92156	0.14
42	0.755048	0.212324	0.624655	0.262826	-0.0578683	4.16701e-07	0.09
43	0.536333	0.0781128	2.39511	-0.0350564	0.00114302	2.4503e-09	0.08
44	0.630236	0.121452	1.4904	0.0715312	0.0159613	3.44994e-09	0.11
45	0.671413	0.0674418	2.00309	0.0615478	0.000663801	5.51285e-09	0.07
46	0.636725	0.0487852	3.93064	-0.0627416	2.5722e-06	1.10396e-11	0.05
47	0.681648	0.998435	0.369312	0.69625	-0.581197	8.54045e-09	0.05
48	0.701172	0.0383493	0.908352	0.00911232	0.0156737	4.3782e-08	0.03
49	0.55179	0.999997	0.645588	0.422502	-0.126621	3.49072e-08	0.18
50	1.42228	0.999997	0.362753	4.79351	-47.9564	14.2654	0.05
51	0.6823	0.999874	0.235548	0.349956	0.120322	3.35106e-06	0.01
52	0.500296	0.278145	0.00100026	0.136376	0.559698	0.889385	0.01
53	1.56754	0.245738	0.585371	5.36614	-31.8646	9.32397	0.08
54	0.689461	0.125563	1.56101	0.127869	0.00777903	9.52567e-11	0.12
55	0.62652	0.342288	0.798543	0.199974	0.038115	4.88187e-07	0.16
56	0.504068	0.999999	0.838904	0.503575	-0.808498	3.13173e-07	0.27
57	0.742631	0.154461	0.928715	0.101324	0.0141411	6.04514e-08	0.11
58	0.862126	0.999996	0.779396	1.15845	-2.78435	1.2553	0.24
59	0.797394	1	0.531009	0.636034	-0.532836	2.68344e-07	0.13
60	0.736258	0.0482519	1.50931	0.0746001	0.000550247	0.00191616	0.05
61	0.799822	0.0516199	2.32521	0.0621402	0.0002944	0.000406798	0.05
62	0.454784	0.0349519	2.26416	-0.0254049	0.000199443	1.87911e-10	0.04
63	1.43455	0.617057	0.0181112	3.45249	-32.3371	13.7099	0.01
64	0.733149	0.0471991	13.9443	0.28368	0.350796	1.24508	0.05
65	0.42	0.0446893	14.309	-0.100243	1.00238	0.990698	0.04
66	1.30626	0.976985	0.19629	3.76769	-49.9389	17.8513	0.01
67	0.566705	0.431431	0.00100003	0.302588	0.0679749	1.1671	0.01
68	0.878353	0.341597	0.929573	0.241186	0.117809	4.64218e-06	0.19
69	0.684269	0.0417315	4.45676	0.127772	0.924979	1.48567	0.04
70	0.828485	0.054872	17.9519	-0.0883437	0.980795	1.07569	0.06
71	0.650539	0.799792	0.001	0.0278907	1.30439	0.594545	0.01
72	0.688631	0.0520903	18.6523	-0.130146	1.0066	0.974249	0.05
73	0.7471	0.121192	0.112049	0.0768453	0.44034	9.1439e-09	0.01
74	0.656766	0.078576	1.78558	0.0452721	0.126957	0.234037	0.08
75	0.85595	0.0536718	16.4608	0.407127	0.420906	1.76609	0.05
76	0.801727	0.0734919	3.94503	-0.057521	5.34893e-05	7.19893e-05	0.07
77	0.865773	0.0582612	7.85956	0.267014	0.640469	1.80414	0.06
78	0.851316	0.0555326	3.44943	-0.0743243	0.000121242	0.000198821	0.06
79	0.590377	0.0576408	2.56791	-0.0247668	0.000401123	0.000236115	0.06
80	0.855333	0.0794912	1.57395	-0.0526005	0.00942831	1.24276e-07	0.08
81	0.83164	0.0954255	1.25729	0.0145658	0.0195734	1.29122e-09	0.09
82	1.19579	0.0361585	1.44159	7.77552	-4.42043	0.712796	0.04
83	0.925234	0.0412811	13.552	-0.426796	1	1	0.04
84	0.923014	0.0652624	1.34602	6.26389	-5.20621	0.784871	0.06
85	0.600001	0.0432239	5.66305	-0.311461	0.999158	1.00328	0.04
86	0.859531	0.036876	3.15975	1.22334	-0.206721	0.26413	0.04
87	1.17859	0.9177	0.802275	9.58108	-22.8853	1.91598	0.25
88	1.49455	0.97227	0.496338	8.28201	-38.9154	6.34253	0.11
89	0.749824	0.027007	1.42328	1.47044	-0.263081	0.18803	0.03
90	0.564705	0.218909	1.43081	1.66763	-1.00147	0.331692	0.19
91	0.425	0.108177	11.0516	-0.177431	1	1	0.11
92	1.12406	0.999994	0.71037	6.87696	-30.8427	4.27821	0.21
93	0.753992	0.0560424	0.001	-0.147022	1.39567	0.655008	0.01
94	0.691645	0.0135813	19.9977	-0.243737	1	1	0.01
95	1.32327	0.136552	0.200651	0.588883	0.417306	18.9824	0.01
96	1.0071	0.997307	0.393841	3.20669	-37.6026	12.0329	0.06
97	0.736195	0.0323311	0.001	0.411887	-0.0128403	1.80006	0.01
98	1.13943	0.999999	0.732541	5.66517	-17.958	2.77761	0.22
99	0.898553	0.999936	0.670384	1.63553	-1.55476	0.0646902	0.19
100	0.776809	0.0788343	2.27869	0.0431329	0.000631366	1.15838e-09	0.08
101	0.608254	0.999426	0.748021	1.59287	-2.44263	2.52146e-07	0.23
102	0.787246	0.0746041	0.600661	0.373136	-0.0487402	0.0470498	0.04
103	0.845863	0.0792547	20	-0.218282	1	1	0.08
104	0.797024	0.935164	1.19759	1.32224	-1.61118	0.651048	0.39
105	0.959559	0.0584724	3.25968	5.45054	-0.37316	0.0718359	0.06
106	0.748203	0.573177	0.0738894	0.147589	0.948228	0.680676	0.01
107	0.68192	0.0100914	0.001	-0.02745	1.22015	0.615298	0.01
108	0.6781	0.513177	0.08014	0.0540705	0.485005	0.000831	0.01
109	0.582253	0.109242	0.489571	0.223754	0.185928	0.311303	0.04
110	0.969076	0.0412505	0.0349625	0.502052	-0.97923	10.8769	0.01
111	0.638332	0.0310414	2.90215	2.82916	-0.446482	0.110731	0.03
112	0.633235	0.0220082	15.7139	-0.14959	1	1	0.02
113	0.54416	0.0100034	19.2093	-0.157973	1	1	0.01
114	0.648032	0.0909853	0.419754	1.92572	-7.47404	2.32882	0.03
115	0.801741	0.156623	0.485458	2.2487	-8.01411	2.69475	0.05
116	0.507266	0.195094	0.628126	0.228648	-0.00420584	1.62285e-09	0.08
117	0.618429	0.0188072	2.29589	1.06488	-0.219928	0.231721	0.02
118	1.15315	0.999854	0.360036	2.71435	-23.0283	10.673	0.05
119	0.753141	0.0306434	0.001	-0.146711	1.2652	0.554583	0.01
120	0.799094	0.418254	0.00100003	0.211732	0.752662	0.986284	0.01
121	0.65641	0.036383	19.9921	-0.06599	1	1	0.04
122	0.787101	0.0100749	0.392935	-0.109684	0.125339	6.6158e-09	0.01
123	0.720855	0.291288	0.001	0.208218	0.698062	1.02118	0.01
124	0.820951	0.20285	16.9533	0.712108	-1.03838	2.12321	0.2
125	0.517232	1	0.657713	-0.116144	1.36955	0.345786	0.19
126	1.16591	0.993466	1.15538	3.40939	-19.1986	6.01091	0.39
127	1.30158	0.999991	1.01214	3.91272	-33.6323	11.1296	0.34
128	0.943732	0.771077	1.1261	0.602511	-0.390995	0.147046	0.34
129	1.5889	0.999999	0.746707	6.09633	-42.7754	10.5648	0.23
130	0.441974	0.198806	1.30507	0.361846	-0.0147973	0.0662934	0.17
131	1.58078	0.999992	0.580798	6.31091	-49.9999	11.9874	0.15
132	0.733044	0.993498	0.43221	0.273406	0.335288	1.1509e-07	0.08
133	0.646816	0.197921	19.2504	0.117699	0.908004	1.33309	0.2
134	0.936982	0.0911536	1.06948	2.84202	-40.6927	14.6316	0.08
135	0.90217	0.33866	0.610262	-2.00015	45.4714	16.6274	0.11
136	0.494692	0.315935	0.001	-0.272766	1.59939	0.0991921	0.01
137	0.592929	0.59072	0.001	-0.148993	1.5716	0.596007	0.01
138	0.750534	1	20	0.304072	0.478702	0.568256	0.95
139	0.586867	0.0458556	20	-0.56498	1.14801	0.697186	0.05
140	1.16339	0.103464	1.5122	-4.28936	37.809	9.00807	0.1
141	0.714648	0.400987	0.00100475	0.109086	0.866871	0.812086	0.01
142	0.59748	0.98051	0.747222	0.30639	0.186322	0.658857	0.23
143	0.946931	0.0784323	2.86234	0.638465	-0.636254	2.1429	0.08
144	0.57625	0.100161	19.9988	0.499092	-0.896137	2.39517	0.1
145	0.480301	0.999946	1.04	0.382067	-0.0645878	3.15196e-08	0.35
146	1.45741	0.999882	1.3422	4.53136	-19.9411	5.4794	0.44
147	0.732224	0.10617	11.9296	0.535787	-0.518517	1.11309	0.11
148	0.635721	0.0689038	3.20618	0.125378	0.8835	1.34739	0.07
149	0.674653	0.996736	0.722	0.574426	-1.04428	2.04994	0.22
150	0.830266	0.179648	1.12925	0.580225	-0.329186	1.49491	0.14
151	0.466476	0.666863	2.45347	0.272497	0.0356187	0.82315	0.53
152	0.632227	0.999997	0.90321	0.660169	-1.35845	0.90072	0.3
153	1.17987	0.539598	0.922195	3.66024	-30.9801	10.1792	0.24
154	1.26264	0.989289	0.601314	4.3998	-46.4678	13.2355	0.16
155	1.2119	0.467927	0.807427	3.55178	-37.8355	13.747	0.19
156	1.27953	0.999636	0.717901	4.71692	-41.9009	10.9013	0.22
157	0.463383	0.268039	1.35896	0.170468	0.0428785	0.145729	0.22
158	0.434602	0.999994	0.74679	0.356674	-0.117899	1.60964e-07	0.23
159	0.536268	0.0485579	1.77154	-0.00367917	0.0439665	0.0509239	0.05
160	1.17388	0.999972	0.625547	3.30554	-40.969	15.2918	0.17
161	0.783714	0.0868711	1.94396	0.707023	-1.13543	2.17027	0.09
162	0.570692	0.108567	15.5217	-0.192474	1.02648	0.897238	0.11
163	0.694366	0.0903464	10.1498	0.100484	0.930494	1.25743	0.09
164	0.989838	0.99999	0.561903	2.43773	-31.9617	14.0094	0.14
165	0.601335	0.112119	12.4078	0.446118	-0.573278	1.02079	0.11
166	0.618255	0.0481385	19.9999	0.226785	0.337078	1.17336	0.05
167	0.499146	0.10201	18.1709	0.237948	0.423699	1.77824	0.1
168	0.525692	0.0918802	2.4719	0.0815359	0.00380553	0.0146588	0.09
169	0.531131	0.106899	1.69127	0.121887	0.00386217	0.038141	0.1
170	0.61522	0.040168	2.61818	0.264645	0.384355	1.47481	0.04
171	0.589636	0.415662	0.781074	0.126628	0.168233	0.020073	0.17
172	0.685623	0.107632	2.7554	0.362523	-0.315125	2.02032	0.11
173	0.617169	0.0628824	3.72844	0.606532	-1.14375	2.64425	0.06
174	0.517073	0.0627294	3.80456	-0.0958455	0.94931	1.07608	0.06
175	0.576148	0.0678257	3.0587	0.576038	-1.15988	2.5585	0.07
176	0.802102	0.119683	1.79534	-0.167663	0.0118274	1.41464e-07	0.12
177	0.833655	0.143848	2.21376	0.855166	-1.34261	2.06188	0.14
178	0.565908	0.0722195	2.72929	0.00582644	0.000567781	0.000161447	0.07
179	0.442306	0.0854778	2.72359	0.145504	0.0449059	0.11047	0.09
180	0.598537	0.0734775	2.72503	-0.0133267	0.00103713	0.000934688	0.07
181	0.667815	0.0494577	19.994	0.284678	0.370945	1.44373	0.05
182	0.363881	0.0527264	14.5641	0.0376612	0.946589	1.20169	0.05
183	0.755583	0.0728445	17.06	0.0635065	0.957842	1.16071	0.07
184	0.695422	0.0718791	0.864727	0.17707	0.116715	0.30368	0.06
185	1.44232	0.999999	0.895003	4.27885	-38.1046	13.2014	0.29
186	0.738556	0.129323	3.99021	0.731875	-1.24931	1.99176	0.13
187	0.436393	0.0931066	1.63939	0.149841	0.144255	0.80745	0.09
188	0.879414	0.0337321	6.27061	0.629664	-0.733243	2.16841	0.03
189	1.25387	0.999942	0.59197	3.81115	-42.9797	14.5947	0.16
190	0.562685	0.05073	19.9977	0.182596	0.315139	1.00196	0.05
191	0.692798	0.888228	0.001	0.323823	-0.259059	1.28826	0.01
192	0.781348	0.0999236	15.8713	0.778389	-1.21017	2.64145	0.1
193	0.582623	0.094648	2.12658	0.166231	0.00151668	3.93314e-09	0.09
194	0.480345	0.10034	2.94963	-0.0813523	1.03393	0.974728	0.1
195	0.557356	0.0825855	2.31345	0.127532	0.00470834	0.0126986	0.08
196	0.568466	0.294977	0.00100001	-0.130845	1.71907	0.388548	0.01
197	0.431537	0.24835	0.0997432	-0.0397189	0.73078	2.95118e-08	0.01
198	0.500011	0.0350806	20	-0.00736574	0.965428	1.13265	0.04
199	0.235986	0.0414681	17.0188	0.10863	0.389752	1.63283	0.04
200	0.341685	0.0742227	3.39316	-0.317918	1.18836	0.706938	0.07
201	0.24268	0.213573	0.001	-0.260862	3.21123	0.784509	0.01
202	0.746502	0.168965	0.619785	-1.96193	33.2219	10.62	0.08
203	0.514605	0.61405	0.00100036	-0.23539	1.26479	0.555248	0.01
204	0.416944	0.423029	0.788007	0.26436	1.05294	4.47876	0.17
205	0.788697	0.999364	0.356212	-1.32329	39.1745	17.1439	0.05
206	0.640108	0.101073	1.67809	1.01457	-7.53618	6.46816	0.1
207	0.545361	0.0296073	4.17916	-0.565379	1.29497	0.755289	0.03
208	0.820716	0.145209	2.12395	0.943557	-1.72353	2.70144	0.14
209	0.892706	0.994307	8.27903	0.436827	0.0305449	0.160828	0.87
210	0.726634	0.0630398	3.81574	1.11473	-2.94464	2.31026	0.06
211	0.867357	0.106575	13.6433	0.641792	-0.529722	1.14009	0.11
212	0.719369	0.0935835	3.50286	0.33126	0.398474	1.64763	0.09
213	0.574995	0.107985	12.8261	-0.439777	1.08748	0.689866	0.11
214	0.791512	0.0878609	1.64857	-0.0961901	0.013882	3.76494e-10	0.09
