# Supplementary material for: Heterogeneous side effects of cortical inactivation in behaving animals
Source: eLife journal article supplement (doi:10.7554/elife.66400), 2021-09-10
Supplement: supp [file Figure5_source_data.xlsx]

## Sheet: Response type percent
	Percent of cell responses
SESSION #	type 1	type2	type 3	type 4
12	100	0	0	0
16	85.7143	14.2857	0	0
10	80	20	0	0
15	80	10	10	0
1	66.6667	26.6667	6.66667	0
11	60	0	40	0
21	58.8235	23.5294	17.6471	0
9	58.3333	8.33333	25	8.33333
13	50	33.3333	16.6667	0
14	50	30	20	0
5	40	40	6.66667	13.3333
19	40	20	30	10
8	33.3333	33.3333	25	8.33333
3	25	37.5	37.5	0
20	25	25	25	25
7	23.0769	23.0769	46.1538	7.69231
2	23.0769	0	23.0769	53.8462
18	22.2222	77.7778	0	0
6	21.4286	50	7.14286	21.4286
17	14.2857	42.8571	42.8571	0
4	12.5	50	25	12.5

## Sheet: Type 1 Dominant Sessions
	LASER TRIALS ( % Correct responses)						CONTROL TRIALS (% CORRECT)
	Stimulus contrast						Stimulus contrast
SESSION #	0	0.035	0.05	0.1	0.2	1	0	0.035	0.05	0.1	0.2	1
12	87.5	NaN	72.2222	77.7778	88.8889	88.8889	87.5	NaN	83.3333	88.8889	83.3333	83.3333
16	88.8889	6.25	20	77.7778	NaN	100	88.5246	12.5	35.2941	66.6667	NaN	100
10	98.9583	8.33333	25	91.6667	NaN	NaN	98.9583	0	41.6667	79.1667	NaN	NaN
15	78.6667	5.55556	38.0952	75	NaN	94.1176	85.2941	26.6667	35.7143	65	NaN	92.8571
1	96.875	NaN	28.5714	71.4286	NaN	100	93.75	NaN	11.1111	44.4444	NaN	100
11	86.6667	NaN	40	26.6667	73.3333	100	83.3333	NaN	20	33.3333	93.3333	93.3333
21	88	10	7	67	NaN	100	91	17	17	73	NaN	100
9	95.8333	3.33333	30	NaN	86.6667	NaN	98.3333	10	26.6667	NaN	80	NaN
13	67.5	16.6667	36.6667	36.6667	NaN	96.6667	68.3333	33.3333	40	50	NaN	100
14	78.7037	14.8148	18.5185	22.2222	NaN	96.2963	72.2222	37.037	11.1111	22.2222	NaN	92.5926

## Sheet: Mixed type sessions
	LASER TRIALS ( % CORRECT)						CONTROL TRIALS (% CORRECT)
	Stimulus contrast						Stimulus contrast
SESSION #	0	0.035	0.05	0.1	0.2	1	0	0.035	0.05	0.1	0.2	1
5	88.8889	NaN	77.7778	88.8889	88.8889	66.6667	86.1111	NaN	55.5556	77.7778	100	55.5556
19	90	16.6667	36.6667	93.3333	NaN	100	83.3333	23.3333	33.3333	100	NaN	100
8	95	NaN	40	60	96.6667	NaN	97.5	NaN	43.3333	73.3333	90	NaN
3	91.6667	NaN	33.3333	94.4444	77.7778	100	83.3333	NaN	55.5556	72.2222	88.8889	100
20	90	13.3333	86.6667	100	NaN	100	83.3333	13.3333	80	100	NaN	100
7	92.5926	59.2593	NaN	96.2963	NaN	NaN	99.0741	59.2593	NaN	96.2963	NaN	NaN
2	96.25	NaN	21.0526	52.6316	78.9474	89.4737	98.75	NaN	23.8095	52.381	61.9048	85.7143
18	75.8333	30	60	93.3333	NaN	96.6667	84.1667	23.3333	63.3333	93.3333	NaN	100
6	98.6111	NaN	72.2222	88.8889	94.4444	22.2222	95.8333	NaN	94.4444	100	100	50
17	82.5	50	40	90	NaN	100	77.5	23.3333	33.3333	86.6667	NaN	96.6667
4	97.9167	NaN	75	91.6667	83.3333	66.6667	100	NaN	75	91.6667	100	83.3333
